# Supplementary material
Source: MDPI journal article supplement (https://www.mdpi.com/2297-8739/9/7/183)
Supplement: s1 [file s1 › separations-1749745-supplementary.pdf]

Supplementary Materials

# Comparison of Supercritical Fluid Chromatography Hyphenated to An Ultraviolet Detector and Gas Chromatography Hyphenated to a Flame Ionization Detector for Qualitative and Quantitative Analysis of *Citrus* Essential Oils

Cyrille Santerre <sup>1,2,3</sup>, Eldra Delannay <sup>2,†</sup>, Pilar Franco <sup>4</sup>, Nadine Vallet <sup>1</sup> and David Touboul <sup>3,5,\*</sup>

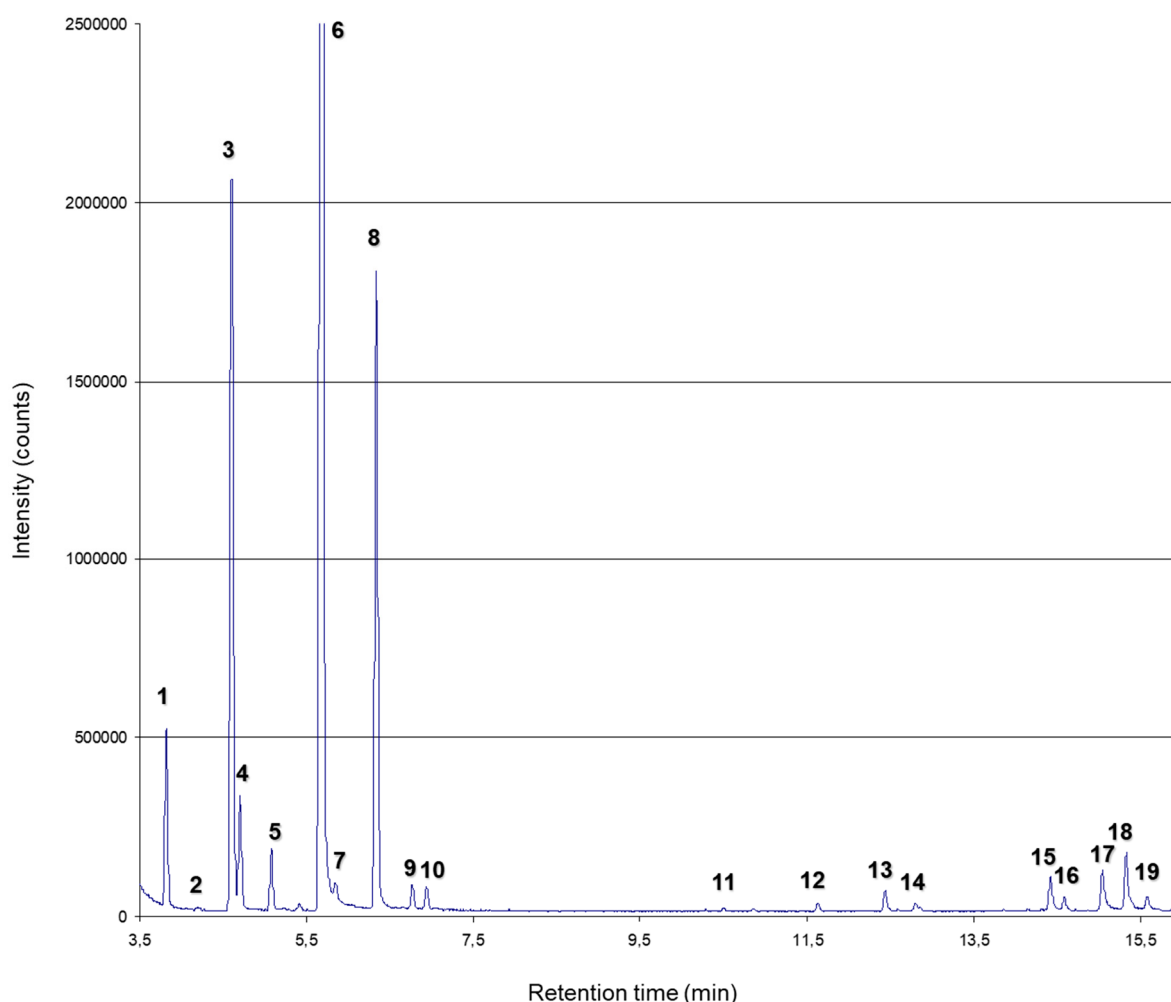

**Figure S1.** Chromatogram and peak identification obtained by GC-MS using column SUPEL-COWAX® 10 (30 m x 0.25 mm x 0.25 mm); temperature from 75 °C to 100 °C at 5 °C/min then from 100 °C to 220 °C at 6 °C/min; helium as carrier gas at a flow rate of 1 mL/ min. FID temperature was set at 260 °C. (1)  $\alpha$ -pinene, (2) camphene, (3)  $\beta$ -pinene, (4) sabinene, (5) myrcene, (6) limonene, (7)  $\beta$ -phellandrene, (8)  $\gamma$ -terpinene, (9) p-cymene, (10) terpinolene, (11) citronellal, (12) linalol, (13)  $\alpha$ -E-bergamotene, (14) E-caryophyllene, (15) neral, (16)  $\alpha$ -terpineol, (17)  $\beta$ -bisabolene, (18) geranial, (19) geranyl acetate.

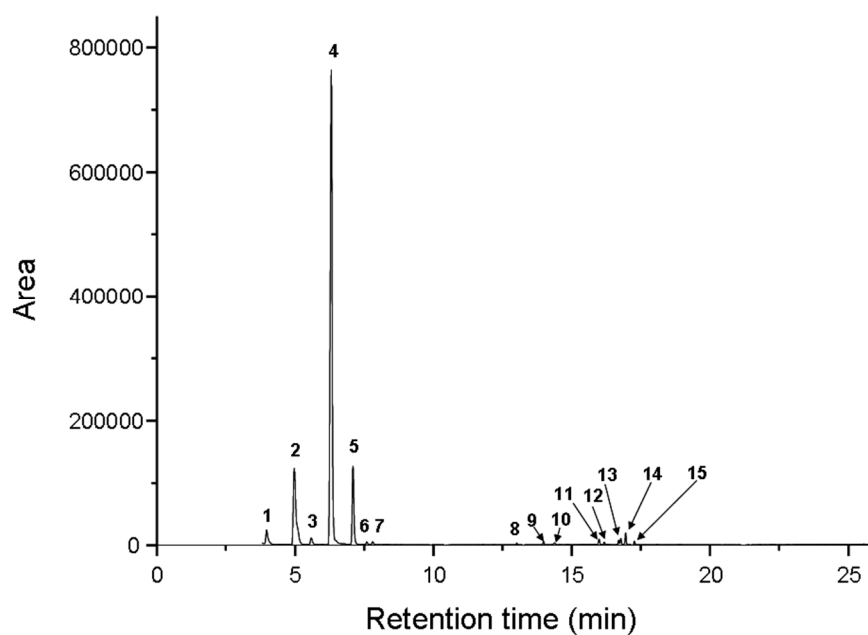

**Figure S2.** Chromatogram and peak identification obtained by GC-FID using column SUPEL-COWAX® 10 (30 m × 0.25 mm, 0.25 mm film thickness); temperature from 75 °C to 100 °C at 5 °C/min then from 100 °C to 220 °C at 6 °C/min; helium as carrier gas at a flow rate of 1 mL/ min. FID temperature was set at 260 °C. (1)  $\alpha$ -pinene, (2)  $\beta$ -pinene, (3) myrcene, (4) limonene, (5)  $\gamma$ terpinene, (6) p-cymene, (7) terpinolene, (8) linalol, (9)  $\alpha$ -E-bergamotene, (10) E-caryophyllene, (11) neral, (12)  $\alpha$ -terpineol, (13)  $\beta$ -bisabolene, (14) geranial, (15) geranyl acetate.

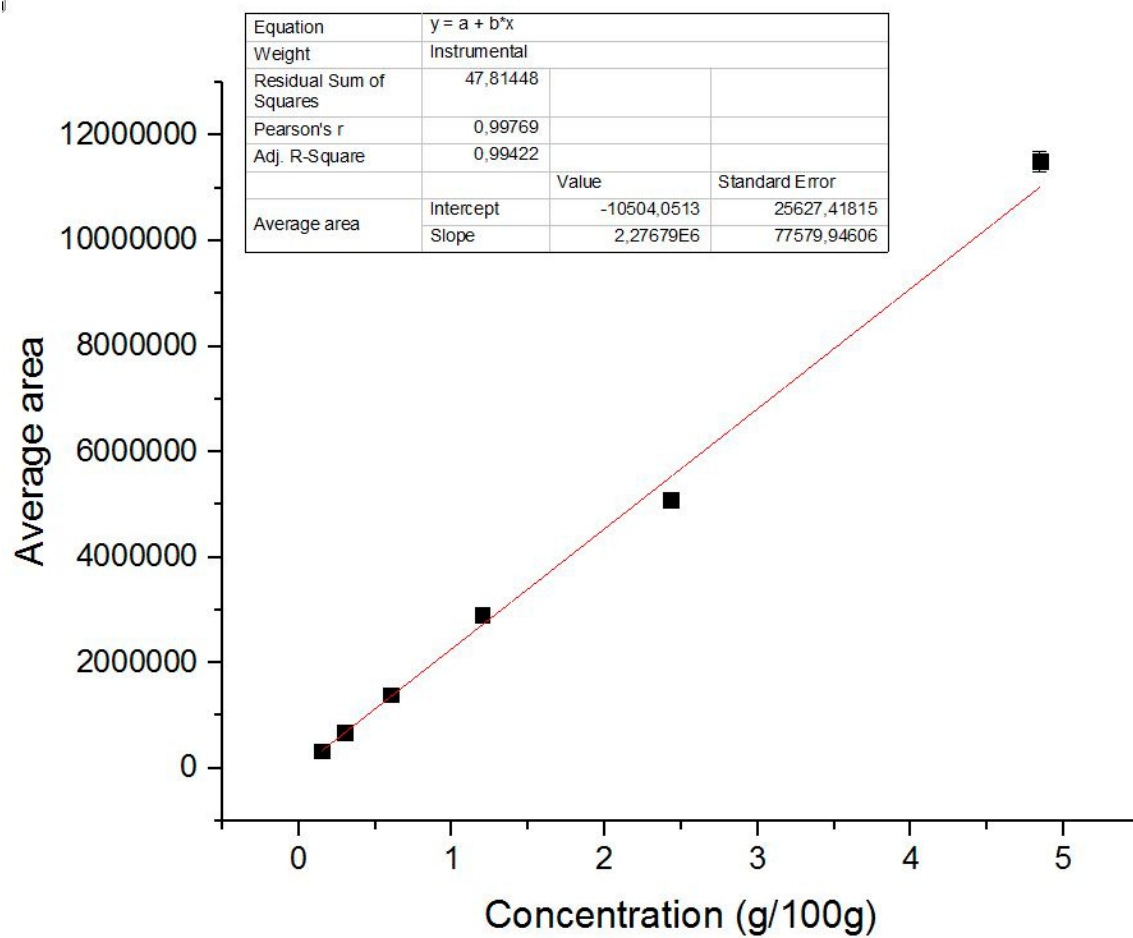

Figure S3. GC-FID R-limonene calibration curve obtained using Origin software.

**Table S1.** Raw data used to obtain the GC-FID calibration curve. Standard concentration used between 4.85 and 0.15 g/100 g of limonene. Injections were performed in triplicate. Chromatographic conditions: injection volume was set at 0.1 µL using a split ratio of 100:1. The following parameters were used for analyses: injector temperature 230 °C, column SUPELLOWAX® 10 (30 m x 0.25 mm x 0.25 µm); temperature from 75 °C to 100 °C at 5 °C/min then from 100 °C to 220 °C at 6 °C/min; helium as carrier gas at a flow rate of 1 mL/ min. FID temperature was set at 260°C.

|         | Standard<br>concentration<br>(g/100g) | Area number<br>1 | Area number<br>2 | Area number<br>3 | Area average | Standard<br>deviation | CV%  |
|---------|---------------------------------------|------------------|------------------|------------------|--------------|-----------------------|------|
| Level 1 | 4.85                                  | 11724420         | 11384934         | 11405466         | 11504940     | 190352                | 1.65 |
| Level 2 | 2.43                                  | 5035676          | 5060222          | 5185914          | 5093937      | 80594                 | 1.58 |
| Level 3 | 1.20                                  | 2907819          | 2989087          | 2850549          | 2915818      | 69615                 | 2.39 |
| Level 4 | 0.60                                  | 1371185          | 1409233          | 1410993          | 1397137      | 22492                 | 1.61 |
| Level 5 | 0.30                                  | 672275           | 682172           | 699481           | 684643       | 13770                 | 2.01 |
| Level 6 | 0.15                                  | 322907           | 320431           | 332309           | 325216       | 6267                  | 1.93 |

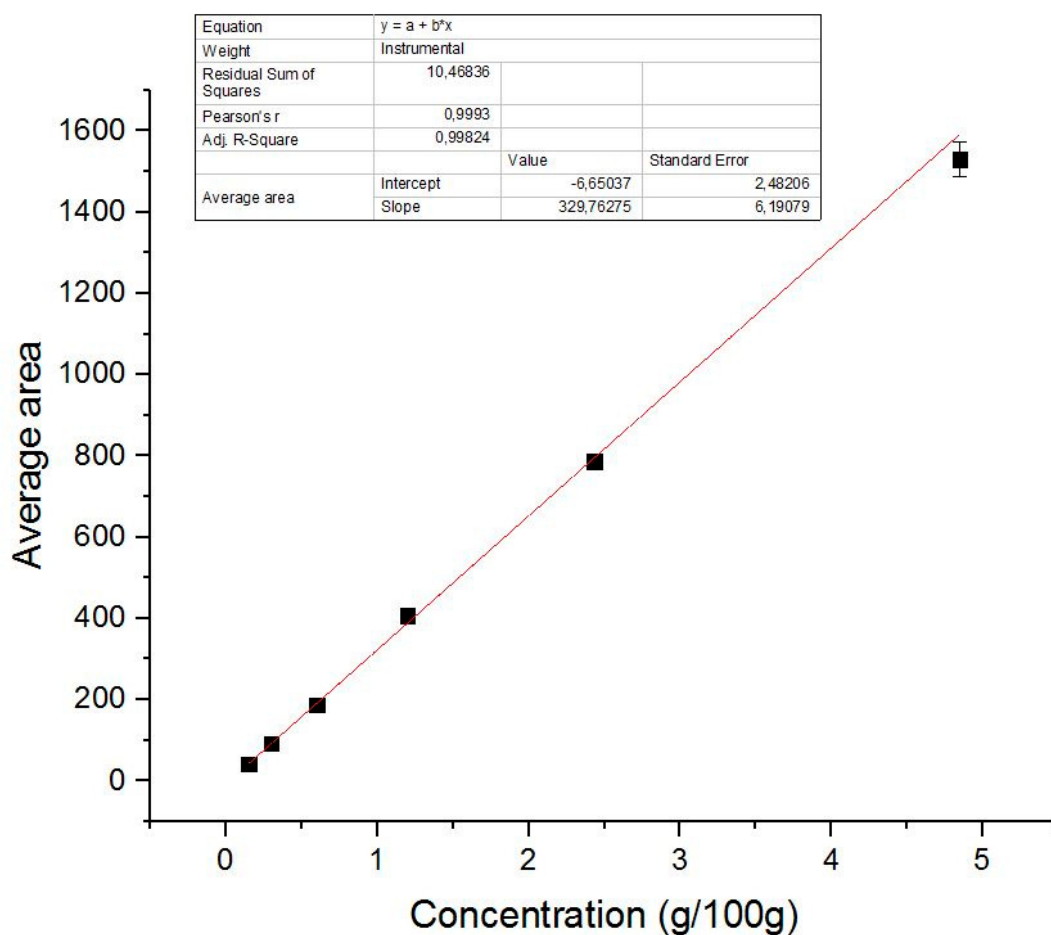

**Figure S4.** SFC-UV R-limonene calibration curve obtained using Origin software.

**Table S2:** Raw data used to obtain the SFC-UV calibration curve. Standard concentration used between 4.85 and 0.15 g/100 g of limonene. Injections were performed in triplicate. Chromatographic conditions: Two columns in series were used for chromatography, i.e. a Hypercarb® (150 mm x 4.6 mm x 5 µm, Thermo Scientific, USA) and a Poly-(butylene terephthalate) DCpack PBT (150 mm x 4.6 mm x 5 µm, DAICEL Corporation, USA). The mobile phase consisting of CO<sub>2</sub> (A) and methanol (B) was introduced at a flow rate of 1.5 mL/min according to the following gradient: 0.0–3.0 min (0% B), 3.0–16.0 min (0–10% B), 16.0–17.0 min (10–0% B) and 17.0–19.0 min (0% B). The column temperature was kept at 60 °C and the back-pressure was fixed at 90 bar.

|         | Standard<br>concentration<br>(g/100g) | Area number<br>1 | Area number<br>2 | Area number<br>3 | Area average | Standard<br>deviation | CV%  |
|---------|---------------------------------------|------------------|------------------|------------------|--------------|-----------------------|------|
| Level 1 | 4.85                                  | 1545.7           | 1561.5           | 1480.2           | 1529.1       | 43.1                  | 2.82 |
| Level 2 | 2.43                                  | 799.8            | 775.1            | 782.5            | 785.8        | 12.7                  | 1.62 |
| Level 3 | 1.20                                  | 399.0            | 413.4            | 408.5            | 407.0        | 7.3                   | 1.80 |
| Level 4 | 0.60                                  | 181.3            | 190.6            | 187.5            | 186.5        | 4.7                   | 2.54 |
| Level 5 | 0.30                                  | 90.3             | 94.9             | 94.0             | 93.1         | 2.4                   | 2.61 |
| Level 6 | 0.15                                  | 40.8             | 43.5             | 42.8             | 42.4         | 1.4                   | 3.35 |
